# Supplementary material for: Epidemiological investigation of allergic rhinitis in children aged 6–12 years in Bayannur City, China
Source: Frontiers journal article supplement (doi:10.3389/fped.2024.1422323), 2024-09-24
Supplement: Data_Sheet_1.pdf [file Data_Sheet_1.pdf]

# Questionnaire on allergic rhinitis in children aged 6-12 years

## Demographic data

1. Gender: ☐ Male ☐ female
2. Age: \_\_\_\_\_ years old. ☐6 ☐7 ☐8 ☐9 ☐10 ☐11 ☐12
3. Ethnic Group: ☐ Han ☐ Minority
4. Residence area ( $\geq 1$  year) : \_\_\_\_\_ (accurate to community)
5. Duration of breastfeeding \_\_\_\_\_. ☐0 ☐0-6 months ☐ > 6
6. Birth\_\_\_\_\_. ☐Eutocia ☐Caesarean section
7. History of food allergy\_\_\_\_\_. ☐No ☐Yes
8. Drug allergy history\_\_\_\_\_. ☐No ☐Yes
9. Frequent use of antibiotics ( $\geq 3$  times per year for  $\geq 3$  days in the past two years) \_\_\_\_\_. ☐No ☐Yes
10. The type of diet you usually eat \_\_\_\_\_. ☐Vegetarianism ☐Eat a balanced diet  
☐Meat-Based

## Clinical symptoms of allergic rhinitis

1. Have you or your child sneezed repeatedly (except when you have a cold) \_\_\_\_\_.  
☐No ☐Yes
2. Have you or your child had recurring nasal congestion (except when they have a cold) \_\_\_\_\_. ☐No ☐Yes
3. Have you or your child had a recurring runny nose (except when a cold) in the past year \_\_\_\_\_. ☐No ☐Yes
4. Whether the nasal symptoms are accompanied by eye symptoms such as itching and tearing \_\_\_\_\_. ☐No ☐Yes

- 5) Months of nasal symptoms (can be selected) \_\_\_\_.
- ☐ 3-5   ☐ 6-8   ☐ 9-11   ☐ 12-2   ☐ None in the year
6. There are triggers for nasal symptoms \_\_\_\_.
- ☐ Dust, pollen, etc   ☐ hair (cat and dog, etc)
7. 1. In the past year, have you or your child experienced allergies \_\_\_\_.
- ☐ No   ☐ Yes
8. In the past year, have you or your child been diagnosed with allergic rhinitis by a healthcare provider \_\_\_\_.
- ☐ No   ☐ Yes
9. Had a positive allergy test (skin prick test, serological specific IgE test and other types of tests) \_\_\_\_.
- ☐ No   ☐ Yes
10. Whether someone in your family (Father, mother, brother/sister, grandparent or grandparent) has an allergic disease \_\_\_\_.
- ☐ No   ☐ Yes
11. Onset time of nasal symptoms \_\_\_\_.
- ☐ No   ☐ < 4 days/week, or symptom duration < 4 weeks   ☐ > 4 days/week, or symptom duration > 4 weeks
12. Severity of nasal symptoms: \_\_\_\_.
- ☐ No   ☐ The symptoms are mild and have no significant impact on the quality of life (daily life, learning, sleep, exercise, etc.)
- ☐ The symptoms are more severe or very severe, and have a significant impact on the quality of life (daily life, learning, sleep, exercise, etc.)

### **Concomitant symptom**

1. Has your child ever been diagnosed with asthma by a doctor \_\_\_\_.
- ☐ No   ☐ Yes
2. Has your child ever been diagnosed with upper airway cough syndrome \_\_\_\_.
- ☐ No   ☐ Yes
3. Has your child ever been diagnosed with secretory otitis media \_\_\_\_.
- ☐ No   ☐ Yes
4. Has your child ever been diagnosed with sleep apnea hypopnea syndrome by a doctor \_\_\_\_.
- ☐ No   ☐ Yes
5. Has your child ever been diagnosed with atopic dermatitis \_\_\_\_.
- ☐ No   ☐ Yes
6. Has your child ever been diagnosed with allergic conjunctivitis \_\_\_\_.

☐ No ☐ Yes
